# Supplementary material
Source: PubMed Central journal article supplement (PMC10591967)
Supplement: NIHMS1932598-supplement-1.pdf [file NIHMS1932598-supplement-1.pdf]

Figure S1 related to Figures 1 and 2

Schematic of CD1 expression and lipid extraction

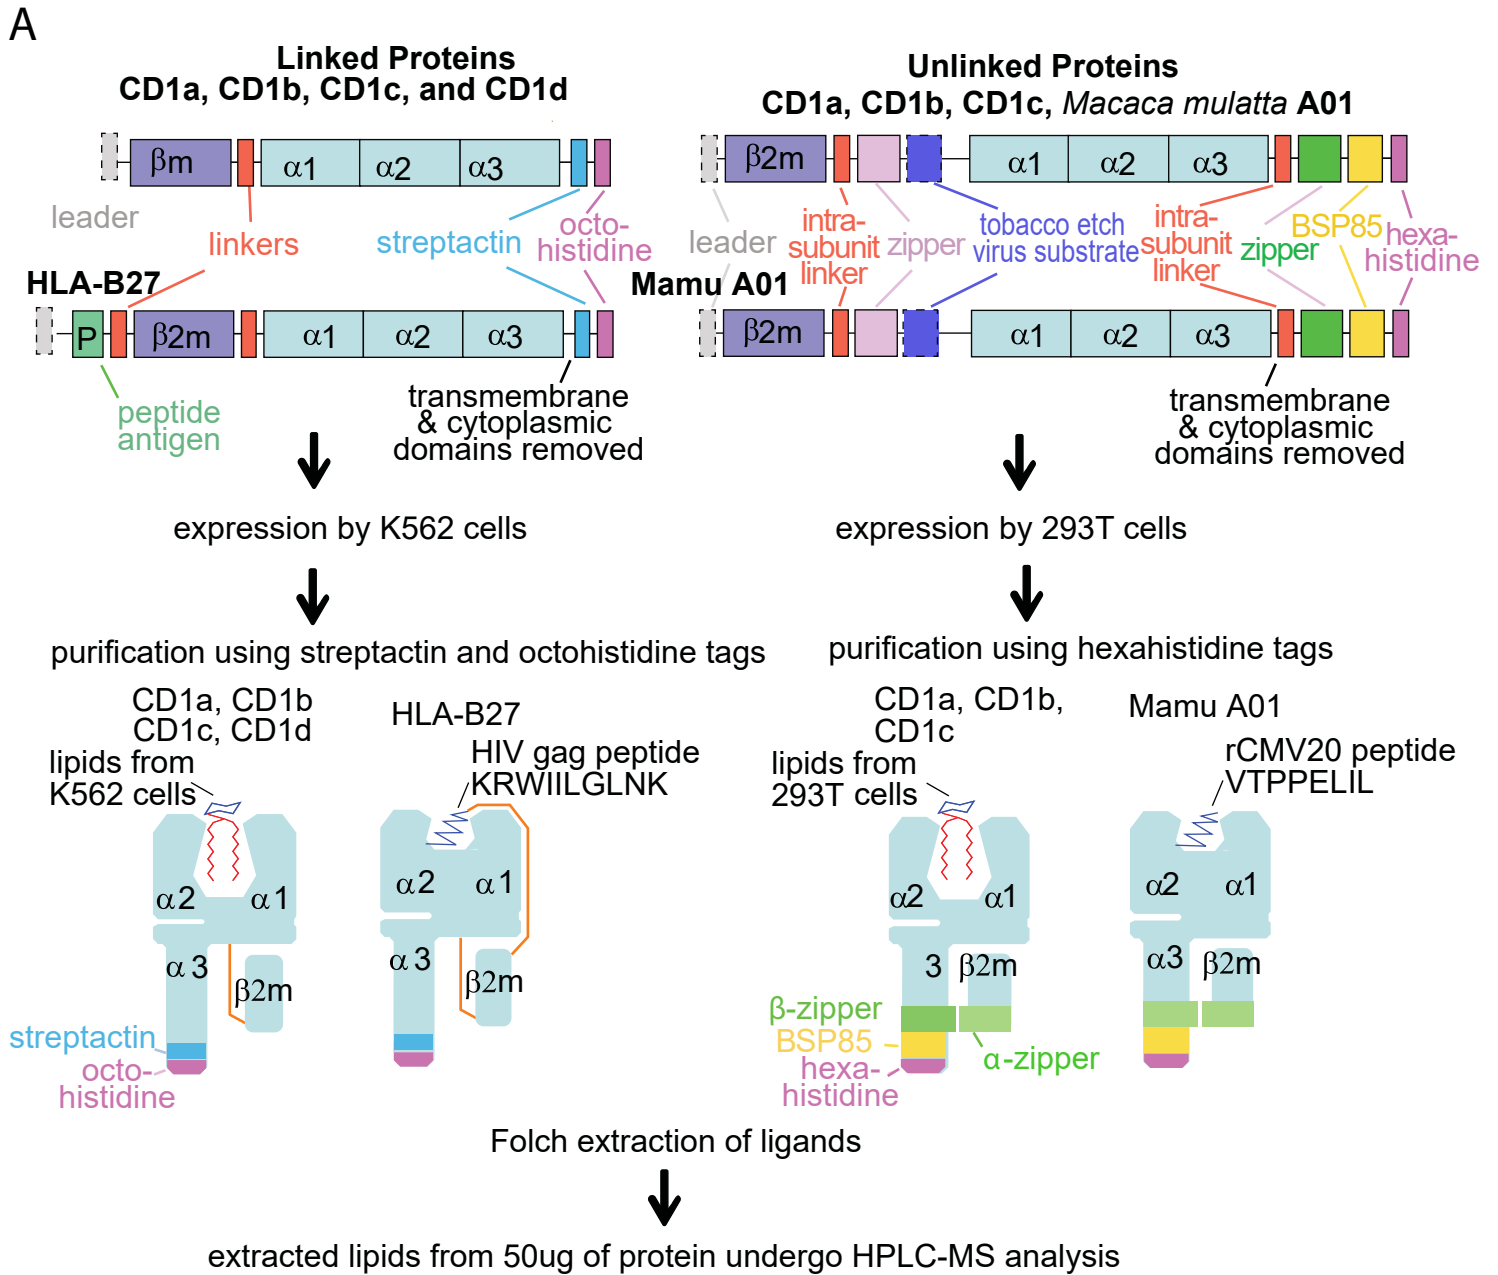

CD1d was constructed without the zipper region. T2A is a peptide (P) from *Thosea asigna* virus for enzyme cleavage upon maturation. BSP85 is a substrate peptide 85 for *E.coli* biotin ligase BirA. rCMB20 is a recombinant cytomegalovirus peptide with the indicated sequence.
