# Supplementary material
Source: PubMed Central journal article supplement (PMC10591967)
Supplement: NIHMS1932598-supplement-5.pdf [file NIHMS1932598-supplement-5.pdf]

## Figure S5 related to Figure 6

### Variability in the CD1 molecule antigen binding pocket architectures

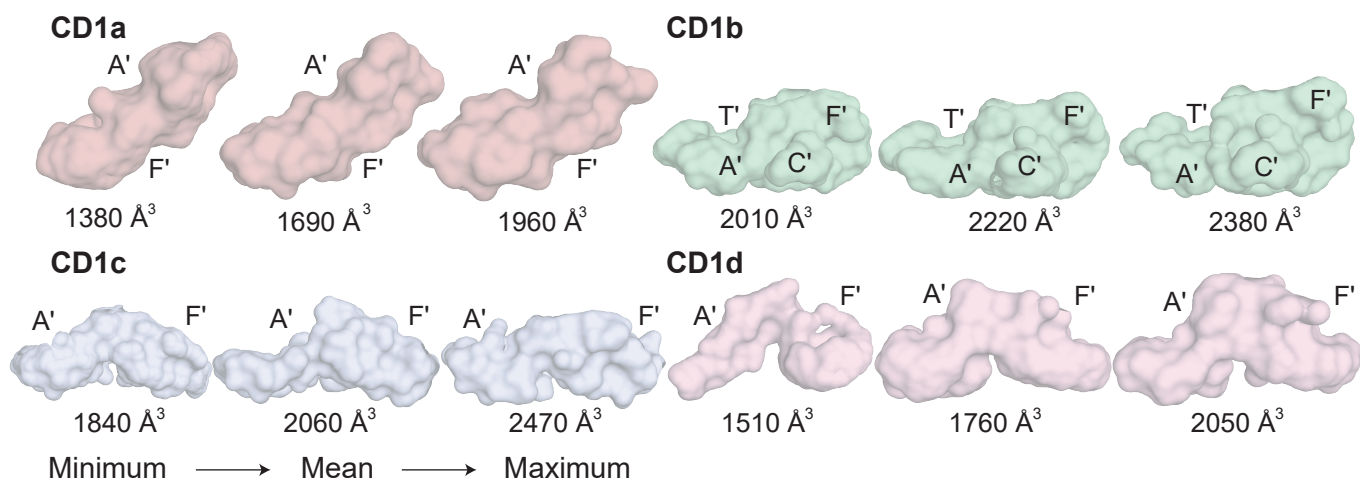

Representative cleft surface traces depict the minimum, mean, and maximum volumes (in  $\text{\AA}^3$ ) for previously solved CD1a, CD1b, CD1c, and CD1d structures.
