# Supplementary material
Source: PubMed Central journal article supplement (PMC10591967)
Supplement: NIHMS1932598-supplement-6.pdf [file NIHMS1932598-supplement-6.pdf]

**Figure S6 related to Figure 7**

**CD1b contacts with solvent exposed self-lipid antigen headgroups**

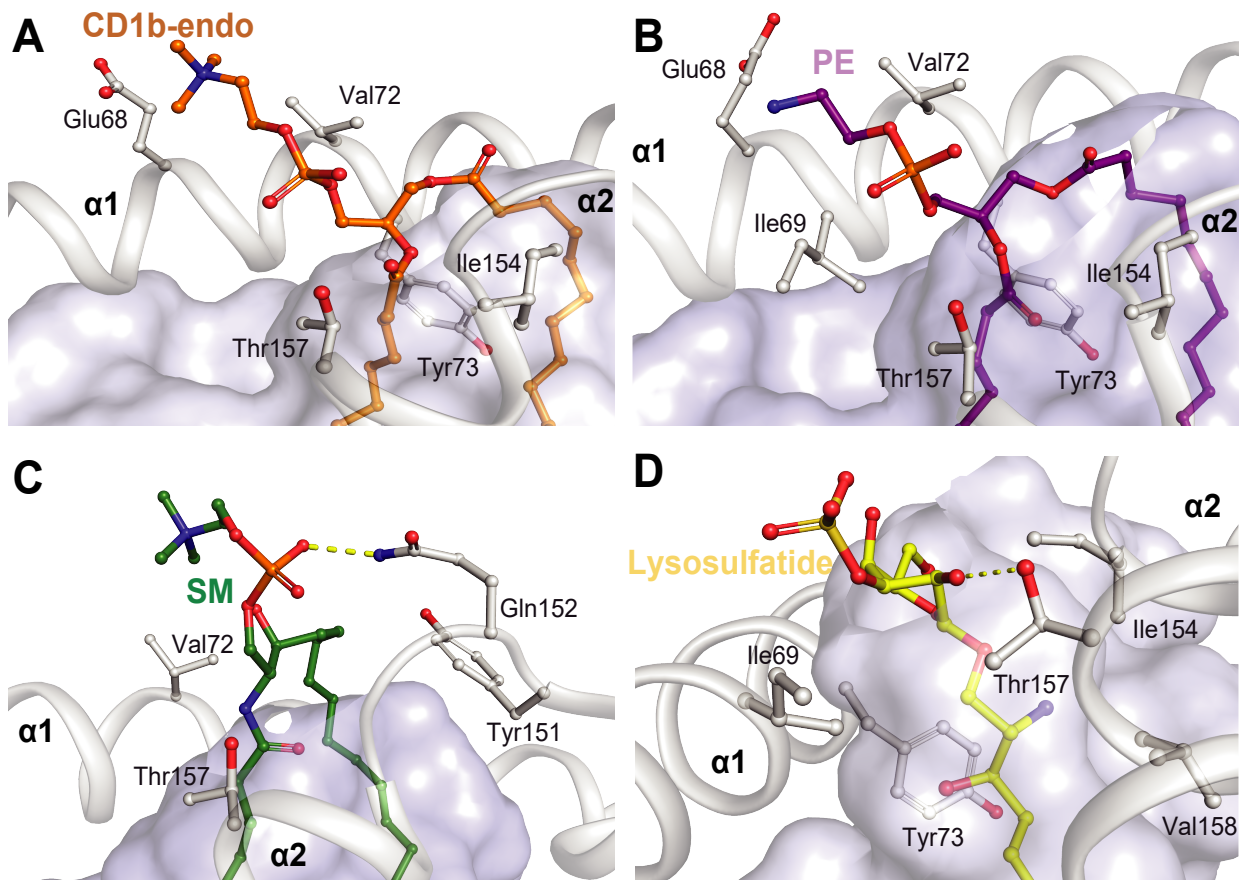

Contacts between CD1b (grey) and **(A)** endogenous phosphatidylcholine (endogPC; orange), **(B)** phosphatidylethanolamine (PE; purple), **(C)** sphingomyelin (SM; green), and **(D)** Lysosulfatide (yellow). CD1b amino acids involved in contacts are represented as sticks, with hydrogen bond formation indicated by yellow dashes. Antigen binding groove is colored in light blue, and sulfur, nitrogen, and oxygen atoms are colored in orange, blue, and red respectively.
