# Supplementary material
Source: PubMed Central journal article supplement (PMC10591967)
Supplement: NIHMS1932598-supplement-7.pdf [file NIHMS1932598-supplement-7.pdf]

## Figure S7 related to Figure 7

Structural overlay reveal consensus on antigenic and spacer lipid placement in CD1b and CD1c

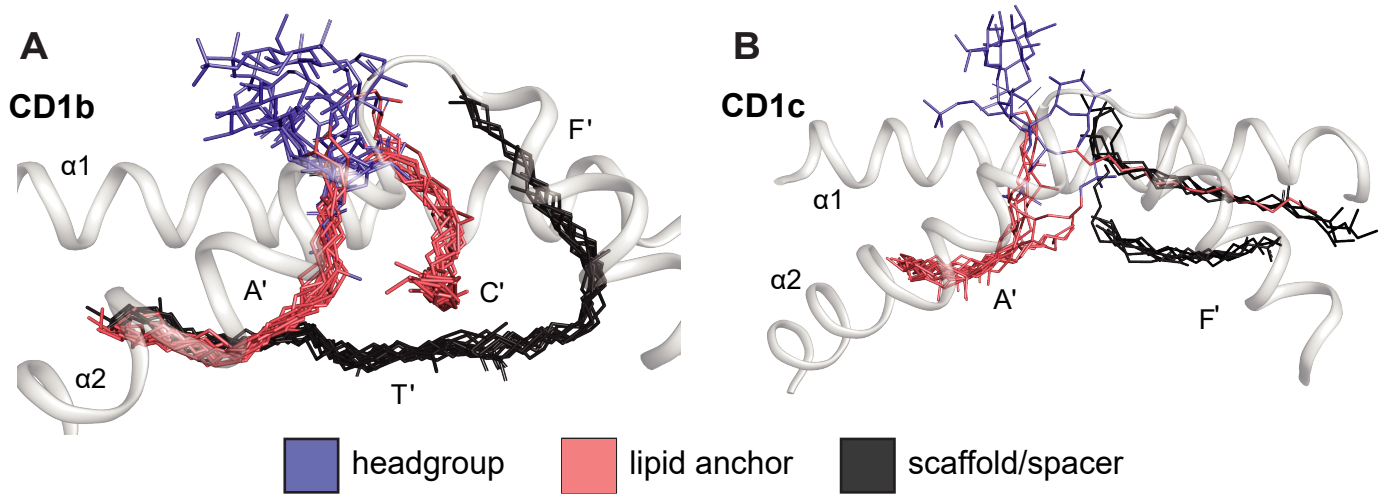

(A) Consensus representation of 13 CD1b crystal structures presenting self lipid antigens demonstrates a distinct two chamber system within the CD1b antigen binding groove. (B) Consensus representation of 5 CD1c structures demonstrates a conserved placement of spacer lipids at the base of the F' portal. CD1b and CD1c are represented in grey, with scaffold and spacer lipids, lipid anchors, and antigen headgroups shown in black, pink, and blue respectively.
