# Supplementary material
Source: PubMed Central journal article supplement (PMC10591967)
Supplement: NIHMS1932598-supplement-8.pdf [file NIHMS1932598-supplement-8.pdf]

**Supplemental Table 3:** CD1 crystal structure summary, including calculated antigen binding pocket volumes and bound lipid tail lengths, related to Figure 6

| PDB                 | Antigen                              | Structure | Volume (Å <sup>3</sup> ) | Antigen (C)      | Spacer/Scaffold (C) | Total (C)        |
|---------------------|--------------------------------------|-----------|--------------------------|------------------|---------------------|------------------|
| <b>CD1a</b>         |                                      |           |                          |                  |                     |                  |
| 1ONQ-A              | Sulfatide                            | CD1       | 1780                     | 34               | 0                   | 34               |
| 1ONQ-B              | Sulfatide                            | CD1       | 1640                     | 34               | 0                   | 34               |
| 1XZ0                | Lipopeptide                          | CD1       | 1870                     | 16               | 0                   | 16               |
| 4X6C                | Lysophosphatidylcholine              | CD1-TCR   | 1380                     | 18               | 0                   | 18               |
| 4X6D                | Oleic acid (endogenous)              | CD1-TCR   | 1380                     | 16               | 0                   | 16               |
| 4X6E                | Lysophosphatidylcholine              | CD1       | 1610                     | 18               | 0                   | 18               |
| 4X6F                | Sphingomyelin 42:2                   | CD1       | 1580                     | 42               | 0                   | 42               |
| 5J1A                | Urushiol                             | CD1       | 1920                     | 15               | 0                   | 15               |
| 6NUX                | Farnesol                             | CD1       | 1750                     | 15               | 0                   | 15               |
| 7KOZ                | Sphingomyelin 36:2                   | CD1       | 1630                     | 36               | 0                   | 36               |
| 7KP0                | Sphingomyelin 42:1                   | CD1       | 1680                     | 42               | 0                   | 42               |
| 7KP1                | Sphingomyelin 42:2                   | CD1       | 1950                     | 42               | 0                   | 42               |
| 7RYO                | Dideoxymycobactin                    | CD1-TCR   | 1960                     | 20               | 0                   | 20               |
| 7RYN                | Sulfatide                            | CD1-TCR   | 1690                     | 40               | 0                   | 40               |
| 7RYM                | Empty                                | CD1-TCR   | 1750                     | -                | -                   | -                |
| 7SH4                | Phosphatidylglycerol                 | CD1       | 1550                     | 36               | 0                   | 36               |
| <b>CD1a Average</b> |                                      |           | <b>1690 ± 180</b>        | <b>16.7/38.3</b> | <b>-</b>            | <b>16.7/38.3</b> |
| <b>CD1b</b>         |                                      |           |                          |                  |                     |                  |
| 1GZP                | Ganglioside GM2                      | CD1       | 2350                     | 36               | 34                  | 60               |
| 1GZQ                | Phosphatidylinositol                 | CD1       | 2310                     | 33               | 34                  | 67               |
| 1UQS                | C54 Glucose Monomycolate             | CD1       | 2320                     | 60*              | 0*                  | 60               |
| 2H26                | Phosphatidylcholine (endogenous)     | CD1       | 2270                     | 34               | 41                  | 75               |
| 3T8X                | Sulfoglycolipid                      | CD1       | 2020                     | 42               | 40                  | 82               |
| 5L2J                | C32 Glucose Monomycolate             | CD1       | 2070                     | 36               | 25                  | 61               |
| 5L2K                | C32 Glucose Monomycolate             | CD1-TCR   | 2120                     | 36               | 25                  | 61               |
| 5WKE                | Phosphatidylserine                   | CD1       | 2220                     | 34               | 34                  | 68               |
| 5WKG                | Phosphatidic Acid                    | CD1       | 2190                     | 34               | 35                  | 68               |
| 5WL1                | Phosphatidylglycerol                 | CD1       | 2190                     | 32               | 34                  | 65               |
| 5WKI                | Phosphatidylglycerol                 | CD1-TCR   | 2190                     | 32               | 22                  | 54               |
| 6CUG                | Phosphatidylcholine                  | CD1-TCR   | 2250                     | 34               | 35                  | 69               |
| 6D64                | Phosphatidylcholine POPC             | CD1       | 2380                     | 34               | 31                  | 65               |
| 8DV3                | Phosphatidylinositol C34:1           | CD1       | 2361                     | 34               | 31                  | 65               |
| 8DV4                | Phosphatidylinositol C34:1           | CD1-TCR   | 2348                     | 34               | 36                  | 70               |
| 8GLE                | Lysosulfatide                        | CD1       | 2220                     | 18*              | 32                  | 50*              |
| 8GLF                | Sphingomyelin                        | CD1       | 2190                     | 34               | 31                  | 65               |
| 8GLG                | Phosphatidylethanolamine             | CD1       | 2360                     | 34               | 25                  | 59               |
| 8GLH                | Phosphatidylcholine (endogenous)     | CD1       | 2120                     | 40               | 16*                 | 56               |
| 8GLI                | C85 Glucose Monomycolate             | CD1       | 2010                     | 71*              | -                   | 71               |
| <b>CD1b Average</b> |                                      |           | <b>2220 ± 110</b>        | <b>34.9</b>      | <b>32.1</b>         | <b>65.3</b>      |
| <b>CD1c</b>         |                                      |           |                          |                  |                     |                  |
| 3OV6                | Mannosyl phosphomycoketide           | CD1       | 2340                     | 32               | 12                  | 44               |
| 4ONO                | Phosphomycoketide                    | CD1       | 2470                     | 32               | 0*                  | 32               |
| 5C9J                | Spacer Lipids                        | CD1       | 1920                     | 18               | 24                  | 42               |
| 6C09                | Monoacylglycerol                     | CD1-TCR   | 2030                     | 16               | 20                  | 36               |
| 6C15                | Phosphatidylcholine (endogenous)     | CD1       | 1900                     | 32               | 12                  | 44               |
| 7MX4                | Mannosyl phosphomycoketides analog 1 | CD1       | 1980                     | 32               | 28                  | 60               |
| 7MXF                | Mannosyl phosphomycoketides analog 2 | CD1       | 1840                     | 32               | 28                  | 60               |
| 7MXH                | Mannosyl phosphomycoketides analog 3 | CD1       | 2010                     | 32               | 28                  | 60               |
| <b>CD1c Average</b> |                                      |           | <b>2060 ± 220</b>        | <b>28.3</b>      | <b>21.7</b>         | <b>47.3</b>      |
| <b>CD1d</b>         |                                      |           |                          |                  |                     |                  |
| 1ZHN                | Phosphatidylcholine                  | CD1       | 1700                     | 37               | 0                   | 37               |
| 1ZT4                | α-Galactosyl ceramide                | CD1       | 1750                     | 41               | 0                   | 41               |
| 1ZT4                | Empty                                | CD1       | 1830                     | -                | -                   | -                |
| 2PO6                | α-Galactosyl ceramide                | CD1-TCR   | 1590                     | 41               | 0                   | 41               |
| 3AU1                | Ganglioside GD3                      | CD1       | 2050                     | 35               | 0                   | 35               |
| 3HUJ                | α-Galactosyl ceramide                | CD1-TCR   | 1550                     | 41               | 0                   | 41               |
| 3QI9                | Phosphatidylinositol                 | CD1-TCR   | 1650                     | 33               | 0                   | 33               |
| 3SCM                | iGB3                                 | CD1-TCR   | 1730                     | 40               | 0                   | 40               |
| 3SDD                | β-lactosyl ceramide                  | CD1-TCR   | 1810                     | 38               | 0                   | 38               |
| 3SDX                | β-galactosyl ceramide                | CD1-TCR   | 1940                     | 40               | 0                   | 40               |
| 3TZV                | Lysophosphatidylcholine              | CD1-TCR   | 2000                     | 18               | 18                  | 36               |
| 3U0P                | Lysophosphatidylcholine              | CD1       | 1920                     | 18               | 0/17                | 35               |

|                     |                                       |         |                   |             |             |             |
|---------------------|---------------------------------------|---------|-------------------|-------------|-------------|-------------|
| 3VWJ                | $\alpha$ -Galactosyl ceramide C20:2   | CD1-TCR | 1870              | 35          | 0           | 35          |
| 3VWK                | 4-deoxy $\alpha$ -Galactosyl ceramide | CD1-TCR | 1750              | 42          | 0           | 42          |
| 4EN3                | $\alpha$ -Galactosyl ceramide         | CD1-TCR | 1580              | 41          | 0           | 41          |
| 4IRS                | $\alpha$ -Galactosyl ceramide         | CD1-TCR | 1680              | 41          | 0           | 41          |
| 4LHU                | PBS-44 $\alpha$ -Galactosyl ceramide  | CD1-TCR | 1510              | 39          | 0           | 39          |
| 4MQ7                | Sulfatide                             | CD1     | 1740              | 40          | 0           | 40          |
| 4WO4                | PBS-44 $\alpha$ -Galactosyl ceramide  | CD1-TCR | 1780              | 39          | 0           | 39          |
| 4WW2                | PBS-44 $\alpha$ -Galactosyl ceramide  | CD1-TCR | 1560              | 39          | 0           | 39          |
| 4WWK                | PBS-44 $\alpha$ -Galactosyl ceramide  | CD1-TCR | 1730              | 39          | 0           | 39          |
| 6CYW                | Sphingomyelin                         | CD1     | 1890              | 42          | 0           | 42          |
| <b>CD1d Average</b> |                                       |         | <b>1760 + 150</b> | <b>37.1</b> | <b>17.5</b> | <b>38.8</b> |

\* Outlier: Excluded from calculations

**Supplemental Table 4.** Data collection and refinement statistics, related to Figure 6 and 7

Highest resolution shell is shown in parenthesis

|                                                        | CD1b-endogenous PC                          | CD1b-SM                                     | CD1b-PE                                     | CD1b-Lyso-sulfatide                         | CD1b-C85-GMM                                |
|--------------------------------------------------------|---------------------------------------------|---------------------------------------------|---------------------------------------------|---------------------------------------------|---------------------------------------------|
| <b>Data Collection statistics</b>                      |                                             |                                             |                                             |                                             |                                             |
| <b>Space group</b>                                     | P 21 21 21                                  |
| <b>Resolution Range (Å)</b>                            | 46.05 – 1.83 (1.87 – 1.83)                  | 48.70 – 2.0 (2.05 – 2.0)                    | 46.49 – 1.60 (1.63 – 1.60)                  | 49.16 – 1.85 (1.92 – 1.85)                  | 46.22 – 2.10 (2.16 – 2.10)                  |
| <b>Cell dimensions (Å, °)</b>                          | a = 57.45, b = 77.05, c = 91.44, α/β/γ = 90 | a = 57.57, b = 77.98, c = 91.32, α/β/γ = 90 | a = 58.10, b = 80.50, c = 93.00, α/β/γ = 90 | a = 57.90, b = 79.50, c = 93.20, α/β/γ = 90 | a = 57.23, b = 76.60, c = 92.45, α/β/γ = 90 |
| <b>Total No. of Reflections</b>                        | 2666560 (15290)                             | 308374 (19017)                              | 852936 (41118)                              | 75763 (7340)                                | 325323 (26636)                              |
| <b>No. of Unique Reflections</b>                       | 36495 (2143)                                | 27135 (1897)                                | 57434 (2741)                                | 37383 (3670)                                | 24370 (2400)                                |
| <b>Multiplicity</b>                                    | 7.3 (7.1)                                   | 11.4 (10.0)                                 | 14.9 (15.0)                                 | 2.0 (2.0)                                   | 13.3 (13.6)                                 |
| <b>Completeness (%)</b>                                | 99.7 (95.7)                                 | 95.7 (92.2)                                 | 98.8 (97.3)                                 | 99.6 (98.5)                                 | 99.6 (100.00)                               |
| <b>CC (1/2)</b>                                        | 0.99 (0.78)                                 | 0.99 (0.720)                                | 0.99 (0.73)                                 | 0.99 (0.84)                                 | 1.00 (0.62)                                 |
| <b>R<sub>pim</sub> (%)<sup>a</sup></b>                 | 3.7 (46.9)                                  | 7.7 (48.9)                                  | 4.1 (54.1)                                  | 3.0 (24.5)                                  | 7.5 (75.3)                                  |
| <b>Mean I / σ(I)<sup>b</sup></b>                       | 19.5 (2.3)                                  | 9.3 (2.1)                                   | 17.2 (2.2)                                  | 8.51 (2.65)                                 | 10.0 (2.40)                                 |
| <b>Refinement Statistics</b>                           |                                             |                                             |                                             |                                             |                                             |
| <b>R<sub>factor</sub>/R<sub>free</sub><sup>c</sup></b> | 17.0/22.4                                   | 17.6/23.0                                   | 18.4/20.9                                   | 18.8/22.9                                   | 20.6/26.7                                   |
| <b>Non-hydrogen atoms</b>                              | 3660                                        | 3490                                        | 3852                                        | 3544                                        | 3342                                        |
| <b>Macromolecule atoms</b>                             | 3020                                        | 3058                                        | 3074                                        | 3048                                        | 2943                                        |
| <b>Ligand atoms</b>                                    | 238                                         | 198                                         | 236                                         | 208                                         | 186                                         |
| <b>Solvent atoms</b>                                   | 402                                         | 234                                         | 542                                         | 288                                         | 213                                         |
| <b>Total No. Protein Residues</b>                      | 393                                         | 380                                         | 380                                         | 397                                         | 379                                         |
| <b>R.M.S.D. from Ideality</b>                          |                                             |                                             |                                             |                                             |                                             |
| <b>Bond Lengths (Å)</b>                                | 0.007                                       | 0.008                                       | 0.009                                       | 0.007                                       | 0.087                                       |
| <b>Bond Angles (°)</b>                                 | 1.00                                        | 0.99                                        | 1.01                                        | 0.92                                        | 0.94                                        |
| <b>Ramachandran Plot</b>                               |                                             |                                             |                                             |                                             |                                             |
| <b>Favoured Region (%)</b>                             | 98.67                                       | 98.67                                       | 99.47                                       | 98.14                                       | 97.33                                       |
| <b>Allowed Region (%)</b>                              | 1.33                                        | 1.33                                        | 0.53                                        | 1.86                                        | 2.67                                        |
| <b>Outliers (%)</b>                                    | 0.00                                        | 0.00                                        | 0.00                                        | 0.00                                        | 0.00                                        |
| <b>B-factors (Å<sup>2</sup>)</b>                       |                                             |                                             |                                             |                                             |                                             |
| <b>Average B-factors</b>                               | 30.48                                       | 31.39                                       | 25.89                                       | 35.98                                       | 32.47                                       |
| <b>Average Macromolecule</b>                           | 27.52                                       | 30.05                                       | 23.24                                       | 34.78                                       | 31.52                                       |
| <b>Average Ligand</b>                                  | 51.32                                       | 47.85                                       | 35.54                                       | 47.79                                       | 40.41                                       |
| <b>Average Solvent</b>                                 | 40.38                                       | 35.00                                       | 36.72                                       | 40.16                                       | 38.59                                       |
| <b>PDB Code Accession</b>                              | 8GLH                                        | 8GLF                                        | 8GLG                                        | 8GLE                                        | 8GLI                                        |

$$^a R_{pim} = \sum hkl [1/(N - 1)]^{1/2} \sum_i |I_{hkl, i} - \bar{I}| / \sum hkl$$

<sup>b</sup>σ(I) is the estimated standard deviation of the integrated intensity (I).

$$^c R_{factor} = \sum hkl ||F_o| - |F_c| || / \sum hkl |F_o| \text{ for all data except 5\%, which were used for } R_{free} \text{ calculation.}$$

**Supplemental Table 5:** Contacts between CD1b and lipid antigen, related to Figure 7

| <b>CD1b</b>           | <b>PE C34:1</b>                 | <b>Bond Type</b> | <b>Pocket</b> |
|-----------------------|---------------------------------|------------------|---------------|
| Phe10                 | C43                             | VDW              | A'            |
| His38                 | C47                             | VDW              | A'            |
| Val63                 | C49                             | VDW              | A'            |
| Leu66                 | C46                             | VDW              | A'            |
| Glu68                 | <b>N29</b>                      | VDW              | -             |
| Ile69                 | <b>C20, C21, O22, O25, C27</b>  | VDW              | -             |
| Val72                 | C18, C19, <b>C28</b>            | VDW              | -             |
| Tyr73                 | C09, <b>O18, C19, C20</b> , C33 | VDW              | A'/T'         |
| Gly76                 | C13, C14                        | VDW              | A'            |
| Phe77                 | C09, C12, C14                   | VDW              | C'            |
| Glu80                 | C13                             | VDW              | C'            |
| Ala100                | C38, C40                        | VDW              | A'            |
| Val126                | C02, C03, C04                   | VDW              | C'            |
| Ala129                | C01                             | VDW              | C'            |
| Cys131                | C03                             | VDW              | C'            |
| Phe144                | C08, C10                        | VDW              | C'            |
| Ile148                | C10, C11                        | VDW              | C'            |
| Ile154                | C11, C13, C15, C16, <b>O17</b>  | VDW              | C'            |
| Met155                | C01                             | VDW              | C'            |
| Thr157                | <b>C31, O32</b>                 | VDW              | -             |
| Ile161                | C38                             | VDW              | A'            |
| Tyr169                | C46, C47, C48                   | VDW              | A'            |
| <b>CD1b</b>           | <b>SM C34:1</b>                 | <b>Bond Type</b> | <b>Pocket</b> |
| Phe10                 | C02                             | VDW              | A'            |
| Leu66                 | C01                             | VDW              | A'            |
| Val72                 | C37                             | VDW              | C'            |
| Tyr73                 | C13, C44                        | VDW              | A'/C'         |
| Gly76                 | C40                             | VDW              | C'            |
| Phe77                 | C40, C42                        | VDW              | C'            |
| Ala100                | C06, C07, C08                   | VDW              | A'            |
| Ile148                | C43, C45                        | VDW              | C'            |
| Tyr151                | C35                             | VDW              | C'            |
| Gln152-N $\epsilon$ 2 | <b>O24</b>                      | HB               | -             |
| Gln152                | <b>O24, O24, P22</b>            | VDW              | -             |
| Gly153                | <b>O24</b>                      | VDW              | -             |
| Ile154                | C41, C46, <b>O17</b>            | VDW              | C'            |
| Thr157                | C14, C20                        | VDW              | A'            |
| Val158                | C12                             | VDW              | A'            |
| Cys166                | C04                             | VDW              | A'            |
| <b>CD1b</b>           | <b>Lysosulfatide</b>            | <b>Bond Type</b> | <b>Pocket</b> |
| Phe10                 | C11, C13                        | VDW              | A'            |
| His38                 | C15, C16                        | VDW              | A'            |
| Val63                 | C17                             | VDW              | A'            |
| Leu66                 | C14                             | VDW              | A'            |

|             |                                     |                  |               |
|-------------|-------------------------------------|------------------|---------------|
| Ile69       | <b>O4</b>                           | VDW              | -             |
| Val72       | <b>C46</b>                          | VDW              | -             |
| Tyr73       | <b>C2, C47, O1</b>                  | VDW              | A'            |
| Ala100      | C5, C7                              | VDW              | A'            |
| Leu114      | C5                                  | VDW              | A'            |
| Ile154      | <b>N, O, C43, C44, C47, C48, O6</b> | VDW              | -             |
| Thr157      | <b>O3</b>                           | VDW              | -             |
| Thr157-O@1  | <b>O3</b>                           | HB               | -             |
| Val158      | <b>N, C1</b>                        | VDW              | -             |
| Leu161      | C4, C6, C8                          | VDW              | A'            |
| Cys166      | C11                                 | VDW              | A'            |
| Tyr169      | C14                                 | VDW              | A'            |
| <b>CD1b</b> | <b>Endogenous C40:5</b>             | <b>Bond Type</b> | <b>Pocket</b> |
| Phe10       | C30                                 | VDW              | A'            |
| Val12       | C39                                 | VDW              | T'            |
| Ile13       | C4128                               | VDW              | T'            |
| Gln14       | C43                                 | VDW              | T'            |
| Gly28       | C40                                 | VDW              | T'            |
| Ser29       | C38, C40                            | VDW              | T'            |
| His38       | C32, C37                            | VDW              | A'/T'         |
| Ala47       | C35                                 | VDW              | T'            |
| Leu66       | C31                                 | VDW              | A'            |
| Glu68       | <b>C09</b>                          | VDW              | -             |
| Ile69       | <b>C11, O62</b>                     | VDW              | -             |
| Phe70       | C20, C36, C42                       | VDW              | A'/T'         |
| Val72       | <b>C04, C09, C45, O10, O46</b>      | VDW              | -             |
| Tyr73       | C12, C16, C48, C53, C54, O46        | VDW              | A'/C'/T'      |
| Gly76       | C49                                 | VDW              | C'            |
| Phe77       | C51                                 | VDW              | C'            |
| Glu80       | C49                                 | VDW              | C'            |
| Ala100      | C22, C24                            | VDW              | A'            |
| Val126      | C58                                 | VDW              | C'            |
| Ile148      | C52, C53                            | VDW              | C'            |
| Ile154      | C50                                 | VDW              | C'            |
| Met155      | C58                                 | VDW              | C'            |
| Thr157      | C14, C15, <b>O44, O62</b>           | VDW              | A'            |
| Val158      | C17                                 | VDW              | A'            |
| Leu161      | C22, C23                            | VDW              | A'            |
| Leu162      | C22                                 | VDW              | A'            |
| Cys166      | C25, C27                            | VDW              | A'            |
| Tyr169      | C30                                 | VDW              | A'            |

VDW: Van der Waals interaction (cut-off of 4.0 Å), HB: Hydrogen Bond (Cut-off of 3.5 Å), SB: Salt Bridge (cut-off of 3.5 Å). Atoms in bold represent lipid headgroup.
